# Supplementary material
Source: PubMed Central journal article supplement (PMC124902)

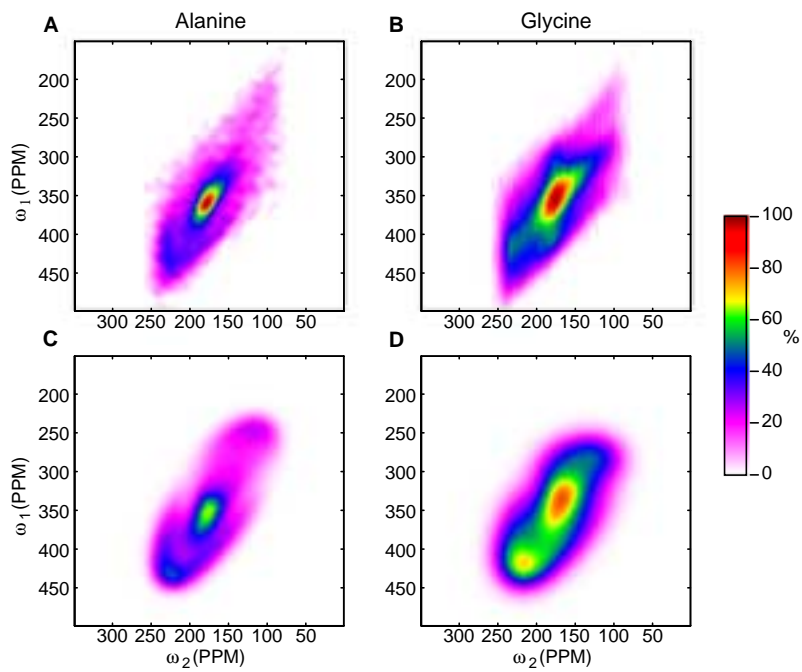

Supplement: pnas_152162299_2.pdf [file pnas_152162299_2.pdf]
